# Supplementary material
Source: PubMed Central journal article supplement (PMC8432575)
Supplement: aem.00972-21-s0008.pdf [file aem.00972-21-s0008.pdf]

**SUPPLEMENTARY FIGURES:**

For Sipes et al AEM submission, “Eight metagenome-assembled genomes provide evidence for microbial adaptation in 20,000 to 1,000,000-year-old Siberian permafrost”

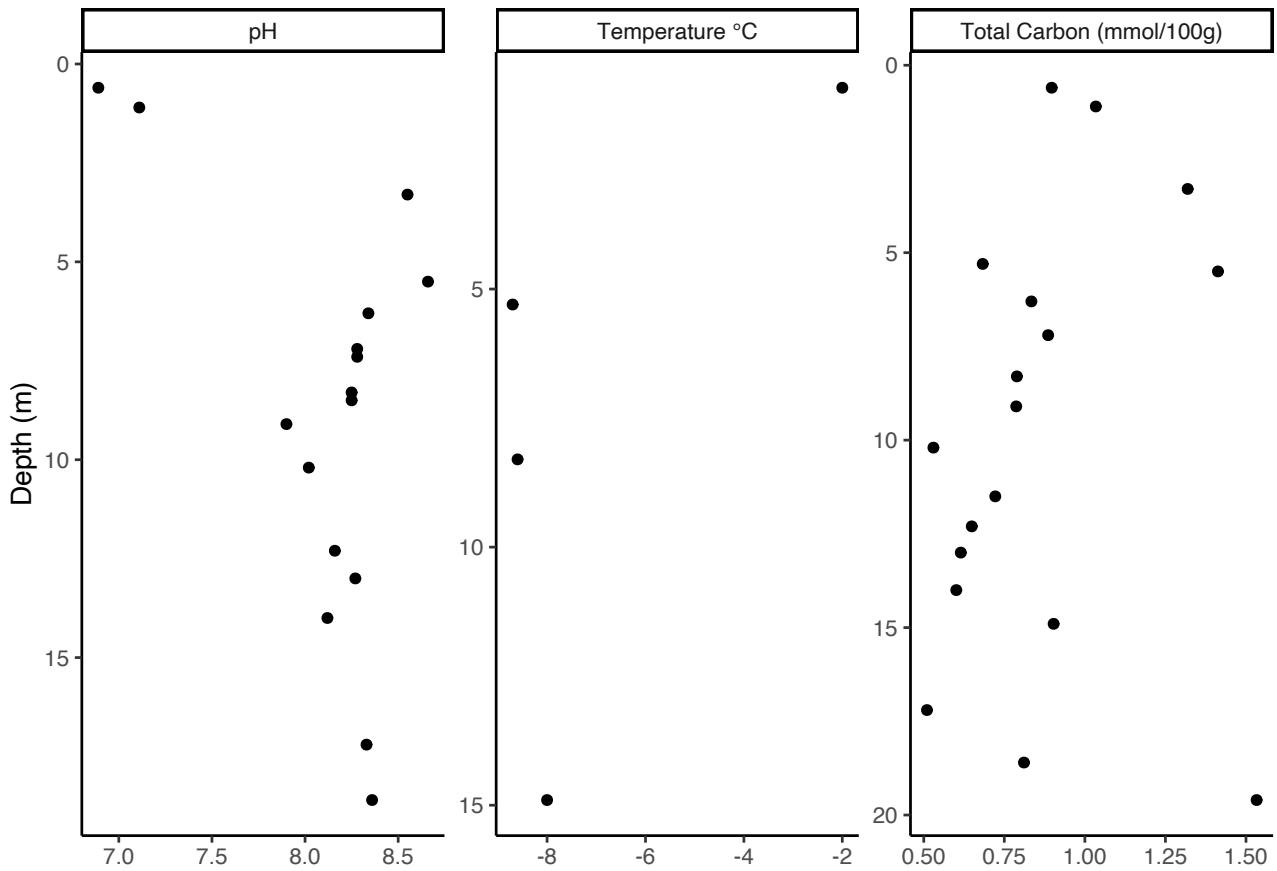

**Figure S1:** Extra field-tested parameters from borehole AL3-15.

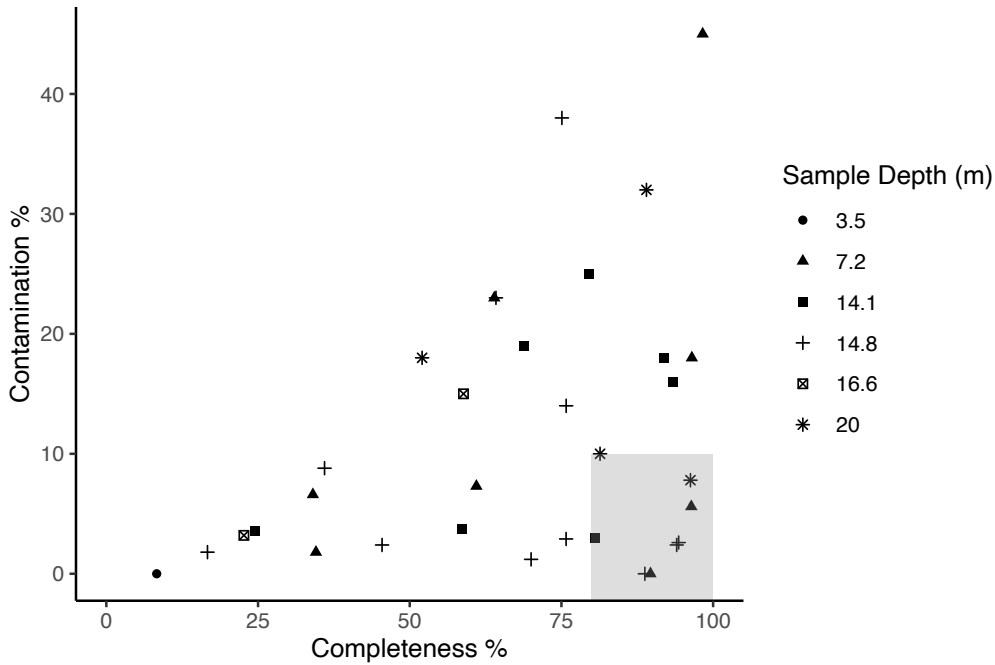

**Figure S2:** Siberian permafrost MAG completeness and contamination, shown by the depth of the permafrost layer from which they originated. The shaded region denotes MAGs that were focused on for this study. ( $\geq 80\%$  completeness,  $< 10\%$  contamination)

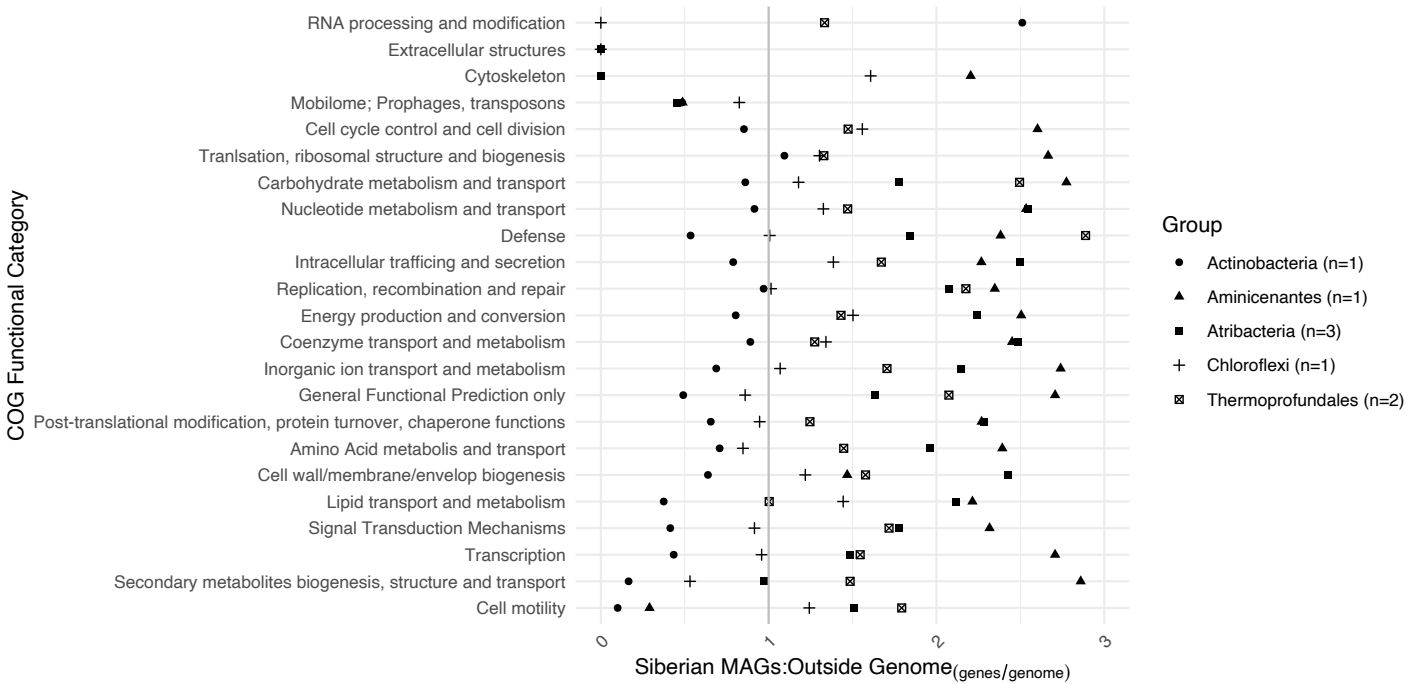

**Figure S3: Ratio of genes per MAG/genome for each group.** Genes were summed for each COG Category and divided by the number of MAGs/genomes for each of the eight Siberian MAGs and for the reference genomes. The values shown are the ratio of these genes per MAG/Genome for the eight Siberian MAGs to the ratio of these genes per MAG/Genome for the reference genomes of that group.

A

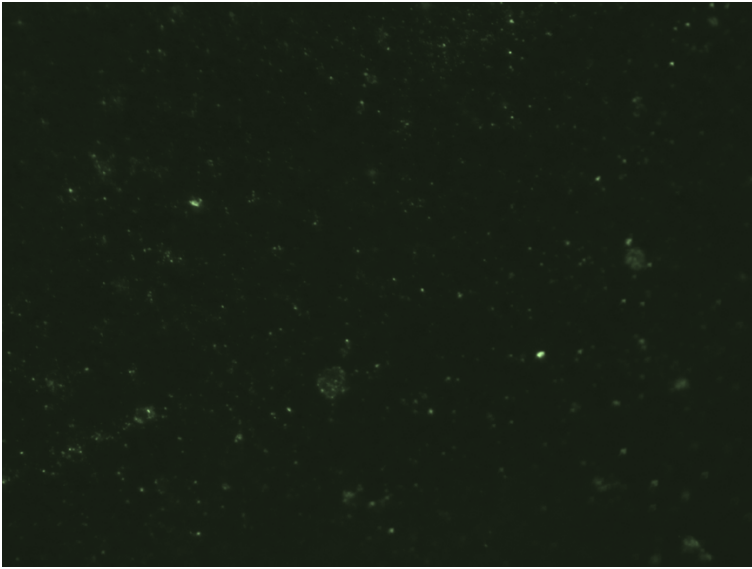

B

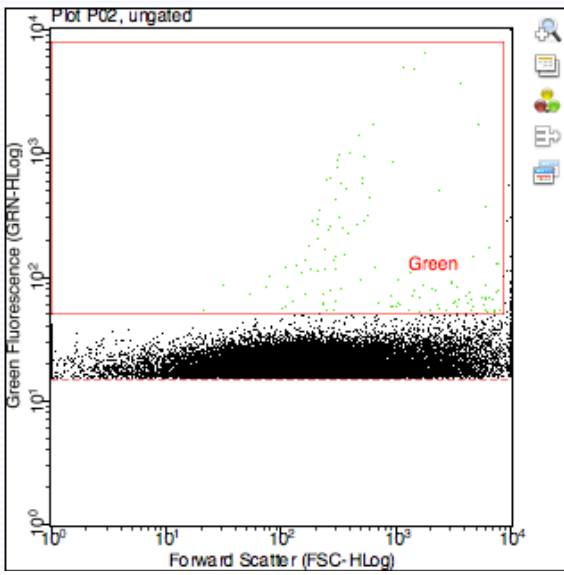

C

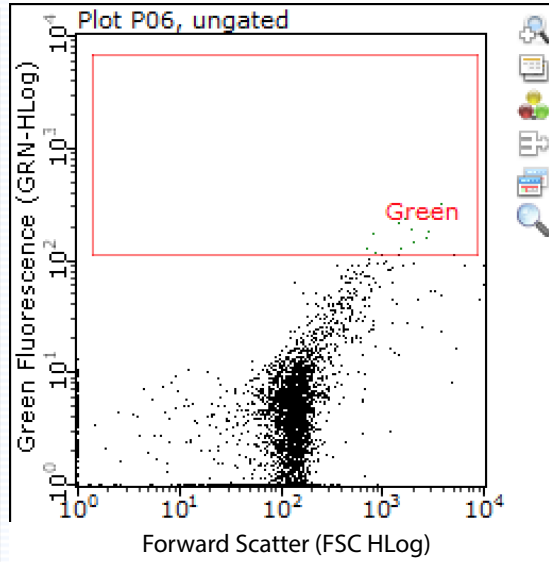

**Figure S4:** **A)** Cells from the 5.6m sample, stained with SYBR Gold and viewed under Zeiss Imager M2 1000X magnification. **B)** Guava easyCyte 12HT Benchtop Flow Cytometer output with a gated size and fluorescence (green region, outlined in the red box) compared to the background noise (black) on 3.5m sample. **C)** Similar as panel B but with 7.2m sample.

A

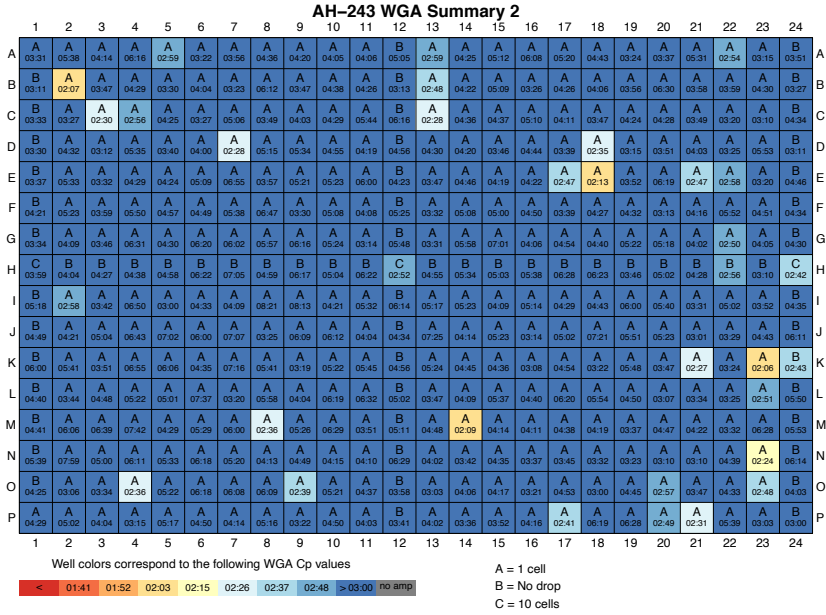

B

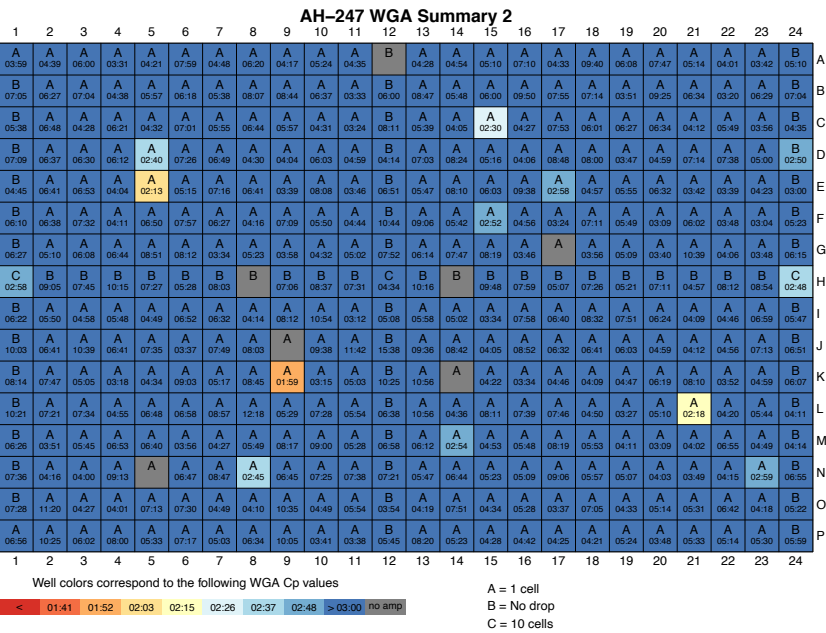

**Figure S5:** Soil from Borehole AL3-15 underwent WGA-X from Bigelow with SAG Generation 2 single cell sorting servicing. AH 243 plate (A) was created from soil 5.6m below the surface, the wells that were taken for further library preparation were B2, E18, K23, M14, and N23. AH247 (B) was from 7.2m below the surface of borehole AL3-15, the wells that were used for library prep were E5, K9, L21, N8, and C15.

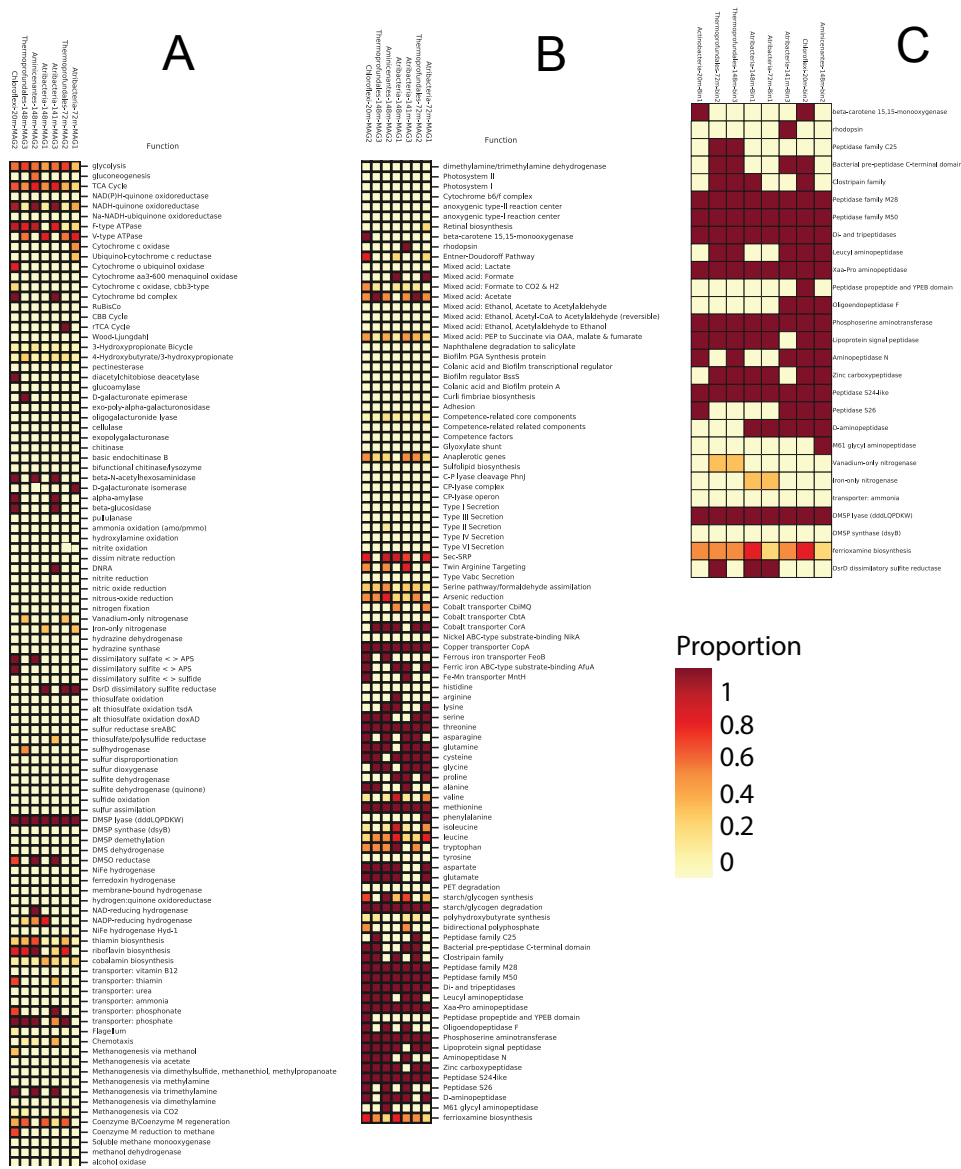

**Figure S6:** Functional pathways for each of the representative MAGs. Code used to make this can be found on <https://github.com/bjtully/BioData/tree/master/KEGGDecoder>. A-B) Standard KEGG-Decoder output cut in half for readability. C) Output from KEGG-Expander code. Color saturation indicates the percentage of genes present from that metabolic pathway. Where single genes are listed instead of pathways (e.g., Leucyl aminopeptidase) the possible values are either 0% or 100%.

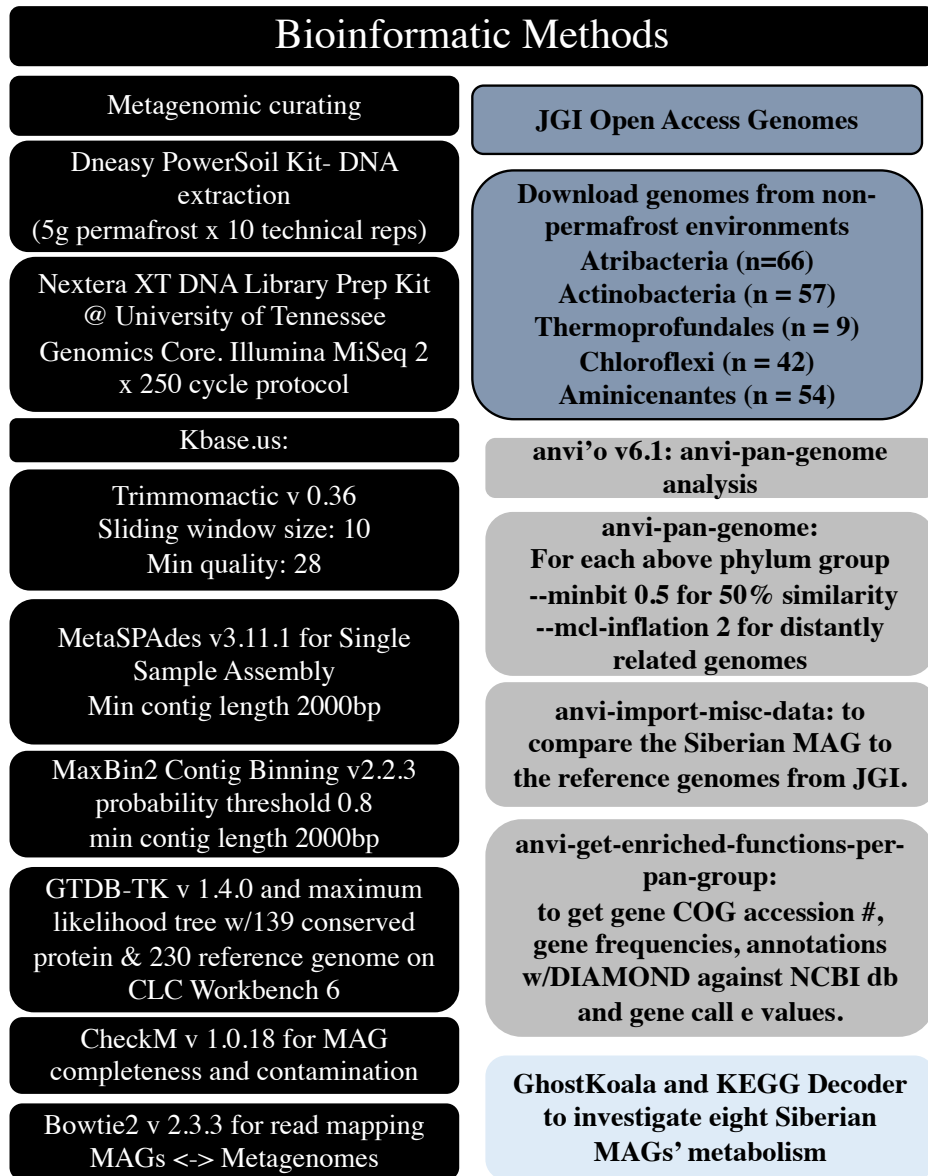

**Figure S7:** Pictorial representation of the methods used to conduct this study with special attention to the parameters used for each step. Black coloration highlights metagenome processing, open access genomes taken from JGI Database is highlighted in blue. Grey color highlights pan genomic analysis done with Anvi'o v 6.1. Light blue highlights KEGG Decoder for metabolism. 'db' stands for database.

**List of Supplementary Datafiles**

| Supplemental Info For | File Number |
|-----------------------|-------------|
| Thermoprofundales     | 1           |
| Atribacteria          | 2           |
| Chloroflexi           | 3           |

|                |   |
|----------------|---|
| Actinobacteria | 4 |
| Aminicenantes  | 5 |
| Genes          | 6 |
| Read Mapping   | 7 |

**Table S1:** Age determination of inorganic and organic fractions using  $^{14}\text{C}$  dating from upper Yedoma Siberian permafrost samples. The inorganic carbon fraction was released via reaction with phosphoric acid. Two different fractions of organic carbon (presumably “younger” and “older”) were sequentially released by combustion at  $400^\circ\text{C}$  and  $800^\circ\text{C}$ , respectively.

| Sample Depth (m) | Treatment   | C yield (mg) | $\delta^{13}\text{C}\%$ VPDB | $^{14}\text{C}$ age BP (yr) |
|------------------|-------------|--------------|------------------------------|-----------------------------|
| 2.9-3            | Inorganic C | 0.73         | -6.0                         | 21,760±120                  |
| 2.9-3            | 400°C       | 1.01         | -26.7                        | 41,700±1,400                |
| 2.9-3            | 800°C       | 1.41         | -28.8                        | 38,590±980                  |
| 3.5              | Inorganic C | 1.64         | -3.7                         | 26,260±210                  |
| 3.5              | 400°C       | 1.21         | -26.9                        | 20,158±99                   |
| 3.5              | 800°C       | 2.34         | -27.5                        | 18,228±78                   |
| 5.6              | Inorganic C | 2.36         | -4.6                         | 33,900±550                  |
| 5.6              | 400°C       | 0.97         | -27.8                        | 38,020±910                  |
| 5.6              | 800°C       | 0.27         | -24.3                        | 29,040±420                  |

**Table S2:** All metagenome assembled genomes (MAG’s) completeness and contamination scores as reported by CheckM. GTDB-Tk taxonomy was used. Missing information is due to unavailable assignments. MAGs analyzed in the main text were those with  $\geq 80\%$  completeness and  $\leq 10\%$  contamination.

| Sample Depth and MAG | Completeness % | Contamination % | Domain   | Phylum              | Class   |
|----------------------|----------------|-----------------|----------|---------------------|---------|
| 03.5m MAG 01         | 8              | 0               | Bacteria | Firmicutes          | Bacilli |
| 07.2m MAG 01         | 90             | 0               | Bacteria | Caldiatribacteriota | JS1     |
| 07.2m MAG 02         | 96             | 6               | Archaea  | Thermoplasmata      | E2      |

|              |    |    |          |                     |                  |
|--------------|----|----|----------|---------------------|------------------|
| 07.2m MAG 03 | 96 | 18 | Bacteria | Planctomycetota     |                  |
| 07.2m MAG 04 | 64 | 23 | Bacteria | Actinobacteriota    | UBA1414          |
| 07.2m MAG 05 | 35 | 2  | Bacteria | Actinobacteriota    | UBA1414          |
| 07.2m MAG 06 | 98 | 44 | Bacteria | Aminicenantes       | Aminicenantia    |
| 07.2m MAG 07 | 61 | 7  | Bacteria | Firmicutes          | Mahellia         |
| 07.2m MAG 08 | 34 | 7  | Archaea  | Bathyarchaeota      |                  |
| 14.1m MAG 01 | 25 | 4  | Bacteria | Actinobacteriota    | UBA1414          |
| 14.1m MAG 02 | 80 | 25 | Bacteria | Caldiatribacteriota | JS1              |
| 14.1m MAG 03 | 81 | 3  | Bacteria | Caldiatribacteriota |                  |
| 14.1m MAG 04 | 59 | 4  | Bacteria | Actinobacteriota    | UBA1414          |
| 14.1m MAG 05 | 93 | 16 | Archaea  | Thermoplasmatota    | E2               |
| 14.1m MAG 06 | 92 | 18 | Bacteria | Aminicenantes       | Aminicenantia    |
| 14.1m MAG 07 | 69 | 19 | Bacteria | Aminicenantes       | Luteitaleia      |
| 14.8m MAG 01 | 89 | 0  | Bacteria | Caldiatribacteriota | JS1              |
| 14.8m MAG 02 | 94 | 3  | Bacteria | Aminicenantes       |                  |
| 14.8m MAG 03 | 94 | 2  | Archaea  | Thermoplasmatota    | E2               |
| 14.8m MAG 04 | 70 | 1  | Bacteria | Actinobacteriota    | UBA1414          |
| 14.8m MAG 05 | 36 | 9  | Bacteria | Planctomycetota     | Phycisphaerae    |
| 14.8m MAG 06 | 17 | 2  | Bacteria | Actinobacteriota    | UBA1414          |
| 14.8m MAG 07 | 76 | 14 | Bacteria | Chloroflexota       | Anaerolineae     |
| 14.8m MAG 08 | 45 | 2  | Bacteria | Actinobacteriota    | UBA1414          |
| 14.8m MAG 09 | 75 | 38 | Archaea  | Crenarchaeota       | Bathyarchaeia    |
| 14.8m MAG 10 | 75 | 3  | Bacteria | Planctomycetota     | FEN-1346         |
| 14.8m MAG 11 | 64 | 23 | Bacteria | Acidobacteriota     | Vicinamibacteria |
| 16.6m MAG 01 | 59 | 15 | Bacteria | Caldiatribacteriota | JS1              |
| 16.6m MAG 2  | 23 | 3  | Bacteria | Chloroflexota       | UBA2235          |
| 20m MAG 01   | 96 | 8  | Bacteria | Actinobacteriota    | Actinobacteria   |
| 20m MAG 02   | 81 | 10 | Bacteria | Chloroflexota       | Anaerolineae     |
| 20m MAG 03   | 89 | 32 | Bacteria | Actinobacteriota    | Thermoleophilia  |
| 20m MAG 04   | 52 | 18 | Bacteria | Actinobacteriota    | Actinobacteria   |

**Table S3:** List of genes that made up the created COG categories in Figure 3B.

| Transporters | GeneName                                                                                    | Taxa           | COG Letter | COG Category                                                           |
|--------------|---------------------------------------------------------------------------------------------|----------------|------------|------------------------------------------------------------------------|
|              | ABC-type transport system involved in Fe-S cluster assembly, permease and ATPase components | Actinobacteria | O          | Post-translational modification, protein turnover, chaperone functions |
|              | Na <sup>+</sup> -translocating ferredoxin:NAD <sup>+</sup> oxidoreductase RNF, RnfG subunit | Actinobacteria | C          | Energy production and conversion                                       |
|              | Succinate-acetate transporter protein                                                       | Aminicenantes  | S          | Function Unknown                                                       |
|              | ABC-type amino acid transport/signal transduction system, periplasmic component/domain      | Atribacteria   | T          | Signal Transduction Mechanisms                                         |



|                          |                                                                                               |                   |   |                                        |
|--------------------------|-----------------------------------------------------------------------------------------------|-------------------|---|----------------------------------------|
|                          | ABC-type amino acid transport/signal transduction system, periplasmic component/domain        | Atribacteria      | E | Amino Acid metabolis and transport     |
|                          | ABC-type amino acid transport/signal transduction system, periplasmic component/domain        | Atribacteria      | T | Signal Transduction Mechanisms         |
|                          | ABC-type amino acid transport/signal transduction system, periplasmic component/domain        | Atribacteria      | E | Amino Acid metabolis and transport     |
|                          | Cation transport ATPase                                                                       | Atribacteria      | P | Inorganic ion transport and metabolism |
|                          | Lipopolysaccharide export system protein LptC                                                 | Atribacteria      | M | Cell wall/membrane/envelop biogenesis  |
|                          | Na <sup>+</sup> /H <sup>+</sup> antiporter NhaD or related arsenite permease                  | Atribacteria      | P | Inorganic ion transport and metabolism |
|                          | Predicted ABC-type sugar transport system, permease component                                 | Atribacteria      | R | General Functional Prediction only     |
|                          | Na <sup>+</sup> /alanine symporter                                                            | Chloroflexi       | E | Amino Acid metabolis and transport     |
|                          | ABC-type glycerol-3-phosphate transport system, periplasmic component                         | Thermoprofundales | G | Carbohydrate metabolism and transport  |
|                          | ABC-type glycerol-3-phosphate transport system, permease component                            | Thermoprofundales | G | Carbohydrate metabolism and transport  |
|                          | ABC-type sugar transport system, ATPase component                                             | Thermoprofundales | G | Carbohydrate metabolism and transport  |
|                          | ABC-type sugar transport system, permease component                                           | Thermoprofundales | G | Carbohydrate metabolism and transport  |
|                          | Ca <sup>2+</sup> /H <sup>+</sup> antiporter                                                   | Thermoprofundales | P | Inorganic ion transport and metabolism |
|                          | Na <sup>+</sup> /H <sup>+</sup> antiporter NhaD or related arsenite permease                  | Thermoprofundales | P | Inorganic ion transport and metabolism |
|                          | Putative Ca <sup>2+</sup> /H <sup>+</sup> antiporter, TMEM165/GDT1 family                     | Thermoprofundales | R | General Functional Prediction only     |
|                          | Ribose/xylose/arabinose/galactoside ABC-type transport system, permease component             | Thermoprofundales | G | Carbohydrate metabolism and transport  |
|                          | TctA family transporter                                                                       | Thermoprofundales | R | General Functional Prediction only     |
| <b>Osmoregulation</b>    |                                                                                               |                   |   |                                        |
|                          | Uncharacterized membrane protein YagU, involved in acid resistance, DUF1440 family            | Actinobacteria    | S | Function Unknown                       |
|                          | Outer membrane lipoprotein SlyB                                                               | Actinobacteria    | M | Cell wall/membrane/envelop biogenesis  |
|                          | Plasmid replication initiator protein                                                         | Actinobacteria    | X | Mobilome; Prophages, transposons       |
|                          | Na <sup>+</sup> -translocating ferredoxin:NAD <sup>+</sup> oxidoreductase RNF, RnfG subunit   | Actinobacteria    | C | Energy production and conversion       |
|                          | Cation transport ATPase                                                                       | Atribacteria      | P | Inorganic ion transport and metabolism |
|                          | Na <sup>+</sup> /H <sup>+</sup> antiporter NhaD or related arsenite permease                  | Atribacteria      | P | Inorganic ion transport and metabolism |
|                          | Na <sup>+</sup> /alanine symporter                                                            | Chloroflexi       | E | Amino Acid metabolis and transport     |
|                          | Uncharacterized membrane protein DedA, SNARE-associated domain                                | Thermoprofundales | S | Function Unknown                       |
|                          | Predicted signal transduction protein containing a membrane domain, an EAL and a GGDEF domain | Thermoprofundales | T | Signal Transduction Mechanisms         |
|                          | Na <sup>+</sup> /H <sup>+</sup> antiporter NhaD or related arsenite permease                  | Thermoprofundales | P | Inorganic ion transport and metabolism |
|                          | Putative Ca <sup>2+</sup> /H <sup>+</sup> antiporter, TMEM165/GDT1 family                     | Thermoprofundales | R | General Functional Prediction only     |
|                          | Ca <sup>2+</sup> /H <sup>+</sup> antiporter                                                   | Thermoprofundales | C | Energy production and conversion       |
|                          | Ca <sup>2+</sup> /H <sup>+</sup> antiporter                                                   | Thermoprofundales | P | Inorganic ion transport and metabolism |
| <b>Sugar Utilization</b> |                                                                                               |                   |   |                                        |
|                          | Phosphotransferase system cellobiose-specific component IIA                                   | Actinobacteria    | G | Carbohydrate metabolism and transport  |

|  |                                                                                      |                |   |                                       |
|--|--------------------------------------------------------------------------------------|----------------|---|---------------------------------------|
|  | Phosphotransferase system cellobiose-specific component IIC                          | Actinobacteria | G | Carbohydrate metabolism and transport |
|  | Cellobiose phosphorylase                                                             | Atribacteria   | G | Carbohydrate metabolism and transport |
|  | D-lyxose ketol-isomerase                                                             | Atribacteria   | G | Carbohydrate metabolism and transport |
|  | Rhamnose utilisation protein RhaD, predicted bifunctional aldolase and dehydrogenase | Atribacteria   | G | Carbohydrate metabolism and transport |
|  | Trehalose-6-phosphate synthase                                                       | Atribacteria   | G | Carbohydrate metabolism and transport |
|  | Predicted ABC-type sugar transport system, permease component                        | Atribacteria   | R | General Functional Prediction only    |
|  | Hydroxyethylthiazole kinase, sugar kinase family                                     | Chloroflexi    | H | Coenzyme transport and metabolism     |
|  | Cellobiose phosphorylase                                                             | Thermoprotunda | G | Carbohydrate metabolism and transport |
|  | Ribose/xylose/arabinose/galactoside ABC-type transport system, permease component    | Thermoprotunda | G | Carbohydrate metabolism and transport |
|  | ABC-type sugar transport system, permease component                                  | Thermoprotunda | G | Carbohydrate metabolism and transport |
|  | ABC-type sugar transport system, ATPase component                                    | Thermoprotunda | G | Carbohydrate metabolism and transport |
